# Supplementary material
Source: HighWire-hosted journal article supplement (https://qdcxjkg.com/highwire/filestream/129995/field_highwire_adjunct_files/1/ERJ-01469-2015_Supplementary_tables.pdf)
Supplement: ERJ-01469-2015_Supplementary_tables.pdf [file ERJ-01469-2015_Supplementary_tables.pdf]

## Supplementary Material

**Table S1a. Clinical characteristics of Control, Sarcoidosis subjects of Koth(17) and Crouser Cohort(18).**

|                                          | Koth et al      |                     |                              |                                    | Crouser et al  |                    |                 |                     |
|------------------------------------------|-----------------|---------------------|------------------------------|------------------------------------|----------------|--------------------|-----------------|---------------------|
|                                          | Control<br>n=20 | Sarcoidosis<br>n=38 | Sarcoidosis<br>n=38          |                                    | Control<br>n=6 | Sarcoidosis<br>n=6 | Control<br>n=11 | Sarcoidosis<br>n=11 |
|                                          |                 |                     | Low lung<br>function<br>n=18 | Normal<br>lung<br>function<br>n=20 |                |                    |                 |                     |
| <b>Age (yr)</b>                          | 51±12           | 50.8±11.2           | 50.3±12.2                    | 51.2±10.7                          | 51±10          | 41±9               | 62±8            | 47±7                |
| <b>Gender (M/F)</b>                      | 5/15            | 17/21               | 11/7                         | 6/14                               | 3/3            | 2/4                | 6/5             | 4/7                 |
| <b>Race (W/AA/other)</b>                 | 16/2/2          | 31/1/6              | 15/2/1                       | 16/2/2                             | 4/2/0          | 4/2/0              | 8/3/0           | 6/5/0               |
| <b>Smoking status (CS/FS/NS/unknown)</b> | 0/0/20/0        | 2/0/36/0            | 2/0/16/0                     | 0/0/20/0                           | 5/0/1/0        | 3/0/2/1            | 7/0/3/1         | 5/0/4/2             |
| <b>FEV1,L</b>                            | NA              | 2.56±0.8            | 2.15±0.7                     | 2.93±0.6                           | NA             | NA                 | NA              | NA                  |
| <b>FEV1, % predicted</b>                 | NA              | 82.2±23.3           | 61.6±13                      | 100.7±12.2                         | NA             | NA                 | NA              | NA                  |
| <b>FVC,L</b>                             | NA              | 3.6±0.8             | 3.42±0.9                     | 3.75±0.7                           | NA             | NA                 | NA              | NA                  |
| <b>FVC, % predicted</b>                  | NA              | 90.3±16.7           | 77.3±9.1                     | 102±12.6                           | NA             | 85±13              | NA              | 83±14               |
| <b>TLC, L</b>                            | NA              | 5.47±1.0            | 5.31±1.1                     | 5.61±1.0                           | NA             | NA                 | NA              | NA                  |
| <b>TLC, % predicted</b>                  | NA              | 94.3±14.9           | 84.6±9                       | 103±13.7                           | NA             | 84±11              | NA              | 89±12               |
| <b>DLco</b>                              | NA              | 21.1±6.0            | 21.1±6.0                     | 22.5±5.5                           | NA             | NA                 | NA              | NA                  |
| <b>DLco, % predicted</b>                 | NA              | 75.1±20.6           | 63.7±17.2                    | 85.3±18.1                          | NA             | 71±16              | NA              | 73±20               |
| <b>Inhaled corticosteroids</b>           | NA              | 9(24%)              | 7(39%)                       | 2(11%)                             | NA             | NA                 | NA              | NA                  |
| <b>systemic therapy</b>                  | NA              | 12-17<br>(32%-45%)  | 8-13<br>(45%-72%)            | 4 (22%)                            | NA             | NA                 | NA              | NA                  |

**Table S1b. Genes upregulated in CBD-stimulated PBMCs compared with BeS -stimulated PBMCs**

| Symbol   | Name                                                                                     | Fold change | Parametric p-value |
|----------|------------------------------------------------------------------------------------------|-------------|--------------------|
| CCL3     | chemokine (C-C motif) ligand 3                                                           | 2.63        | 0.00152            |
| GEM      | GTP binding protein overexpressed in skeletal muscle                                     | 2.33        | 0.00157            |
| SLC15A3  | solute carrier family 15 (oligopeptide transporter), member 3                            | 2.27        | 0.00116            |
| LILRB4   | leukocyte immunoglobulin-like receptor, subfamily B (with TM and ITIM domains), member 4 | 2.22        | 0.00119            |
| IER3     | immediate early response 3                                                               | 2.04        | 0.00082            |
| MSR1     | macrophage scavenger receptor 1                                                          | 1.96        | 0.00134            |
| CSRNP1   | cysteine-serine-rich nuclear protein 1                                                   | 1.89        | 0.00028            |
| LILRB2   | leukocyte immunoglobulin-like receptor, subfamily B (with TM and ITIM domains), member 2 | 1.89        | 0.00184            |
| C2       | complement component 2                                                                   | 1.85        | 0.00137            |
| PPP1R15A | protein phosphatase 1, regulatory subunit 15A                                            | 1.85        | 0.00129            |
| DTHD1    | death domain containing 1                                                                | 1.82        | 0.00150            |
| ETS2     | v-ets avian erythroblastosis virus E26 oncogene homolog 2                                | 1.82        | 0.00240            |
| UNC93B1  | unc-93 homolog B1 (C. elegans)                                                           | 1.82        | 0.00080            |
| FNIP2    | folliculin interacting protein 2                                                         | 1.79        | 0.00097            |
| GADD45G  | growth arrest and DNA-damage-inducible, gamma                                            | 1.79        | 0.00045            |
| JUNB     | jun B proto-oncogene                                                                     | 1.75        | 0.00017            |
| KLF10    | Kruppel-like factor 10                                                                   | 1.72        | 0.00233            |
| PRKD2    | protein kinase D2                                                                        | 1.72        | 0.00152            |
| RNF19B   | ring finger protein 19B                                                                  | 1.72        | 0.00094            |
| GRN      | granulin                                                                                 | 1.67        | 0.00234            |
| HLA-DPB1 | major histocompatibility complex, class II, DP beta 1                                    | 1.64        | 0.00055            |
| CD81     | CD81 molecule                                                                            | 1.61        | 0.00001            |
| CD97     | CD97 molecule                                                                            | 1.61        | 0.00223            |
| CTSD     | cathepsin D                                                                              | 1.61        | 0.00238            |
| NFKBIA   | nuclear factor of kappa light polypeptide gene enhancer in B-cells inhibitor, alpha      | 1.61        | 0.00141            |
| TRIB1    | tribbles pseudokinase 1                                                                  | 1.59        | 0.00020            |
| BCKDK    | branched chain ketoacid dehydrogenase kinase                                             | 1.56        | 0.00000            |
| PLK3     | polo-like kinase 3                                                                       | 1.56        | 0.00019            |
| RBCK1    | RanBP-type and C3HC4-type zinc finger containing 1                                       | 1.56        | 0.00157            |
| BAK1     | BCL2-antagonist/killer 1                                                                 | 1.54        | 0.00165            |
| DUSP4    | dual specificity phosphatase 4                                                           | 1.54        | 0.00130            |
| LILRA6   | leukocyte immunoglobulin-like receptor, subfamily A (with TM domain), member 6           | 1.54        | 0.00014            |
| PLOD3    | procollagen-lysine, 2-oxoglutarate 5-dioxygenase 3                                       | 1.54        | 0.00000            |
| RHBDF2   | rhomboid 5 homolog 2 (Drosophila)                                                        | 1.54        | 0.00013            |

|          |                                                                                |      |         |
|----------|--------------------------------------------------------------------------------|------|---------|
| SLC25A25 | solute carrier family 25 (mitochondrial carrier; phosphate carrier), member 25 | 1.54 | 0.00038 |
| FERMT3   | fermitin family member 3                                                       | 1.52 | 0.00002 |
| MYO1G    | myosin IG                                                                      | 1.52 | 0.00020 |
| NEU1     | sialidase 1 (lysosomal sialidase)                                              | 1.52 | 0.00098 |
| P2RX4    | purinergic receptor P2X, ligand-gated ion channel, 4                           | 1.52 | 0.00006 |
| SERTAD3  | SERTA domain containing 3                                                      | 1.52 | 0.00022 |
| SNORD4A  | small nucleolar RNA, C/D box 4A                                                | 1.52 | 0.00117 |
| UBTD2    | ubiquitin domain containing 2                                                  | 1.52 | 0.00004 |

**Table S1c. Genes downregulated in CBD-stimulated PBMCs compared with BeS-stimulated PBMCs.**

| <b>Symbol</b> | <b>Name</b>                                           | <b>Fold-change</b> | <b>Parametric p-value</b> |
|---------------|-------------------------------------------------------|--------------------|---------------------------|
| MIR181C       | microRNA 181c                                         | 0.57               | 0.00038                   |
| RNASE3        | ribonuclease, RNase A family, 3                       | 0.58               | 0.00174                   |
| MIR134        | microRNA 134                                          | 0.65               | 0.00018                   |
| EIF3E         | eukaryotic translation initiation factor 3, subunit E | 0.65               | 0.00133                   |
| SNORD116-15   | small nucleolar RNA, C/D box 116-15                   | 0.66               | 0.00086                   |

**Table S2a. Top 50 genes upregulated in CBD-stimulated PBMCs compared with Con -stimulated PBMCs.**

| Symbol   | Name                                                                                     | Fold-change | Parametric p-value |
|----------|------------------------------------------------------------------------------------------|-------------|--------------------|
| CXCL9    | chemokine (C-X-C motif) ligand 9                                                         | 7.33        | 0.00166            |
| HCAR3    | hydroxycarboxylic acid receptor 3                                                        | 5.85        | 0.00111            |
| HCAR2    | hydroxycarboxylic acid receptor 2                                                        | 5.65        | 0.00038            |
| CD274    | CD274 molecule                                                                           | 5.48        | 0.00065            |
| CLEC6A   | C-type lectin domain family 6, member A                                                  | 4.14        | 0.00234            |
| EGR2     | early growth response 2                                                                  | 3.45        | 0.00039            |
| IL3RA    | interleukin 3 receptor, alpha (low affinity)                                             | 3.29        | 0.00010            |
| SECTM1   | secreted and transmembrane 1                                                             | 3.25        | 0.00023            |
| ICAM1    | intercellular adhesion molecule 1                                                        | 2.97        | 0.00036            |
| HBEGF    | heparin-binding EGF-like growth factor                                                   | 2.92        | 0.00196            |
| P2RX7    | purinergic receptor P2X, ligand-gated ion channel, 7                                     | 2.81        | 0.00128            |
| ATF3     | activating transcription factor 3                                                        | 2.74        | 0.00020            |
| STX11    | syntaxin 11                                                                              | 2.72        | 0.00017            |
| SLC15A3  | solute carrier family 15 (oligopeptide transporter), member 3                            | 2.72        | 0.00013            |
| SOCS3    | suppressor of cytokine signaling 3                                                       | 2.68        | 0.00023            |
| FAM26F   | family with sequence similarity 26, member F                                             | 2.65        | 0.00084            |
| ARRDC4   | arrestin domain containing 4                                                             | 2.65        | 0.00045            |
| GEM      | GTP binding protein overexpressed in skeletal muscle                                     | 2.6         | 0.00050            |
| LILRB4   | leukocyte immunoglobulin-like receptor, subfamily B (with TM and ITIM domains), member 4 | 2.56        | 0.00074            |
| CCR1     | chemokine (C-C motif) receptor 1                                                         | 2.55        | 0.00246            |
| SDC4     | syndecan 4                                                                               | 2.44        | 0.00088            |
| IRF1     | interferon regulatory factor 1                                                           | 2.44        | 0.00026            |
| PSME2    | proteasome (prosome, macropain) activator subunit 2 (PA28 beta)                          | 2.35        | 0.00103            |
| CISH     | cytokine inducible SH2-containing protein                                                | 2.32        | 0.00010            |
| SOCS1    | suppressor of cytokine signaling 1                                                       | 2.3         | 0.00045            |
| CCRL2    | chemokine (C-C motif) receptor-like 2                                                    | 2.24        | 0.00066            |
| TAP1     | transporter 1, ATP-binding cassette, sub-family B (MDR/TAP)                              | 2.23        | 0.00103            |
| ARHGAP31 | Rho GTPase activating protein 31                                                         | 2.23        | 0.00020            |
| CDKN1A   | cyclin-dependent kinase inhibitor 1A (p21, Cip1)                                         | 2.19        | 0.00033            |
| STEAP4   | STEAP family member 4                                                                    | 2.13        | 0.00037            |
| KLF10    | Kruppel-like factor 10                                                                   | 2.11        | 0.00043            |
| TRIM25   | tripartite motif containing 25                                                           | 2.1         | 0.00168            |
| RASGEF1B | RasGEF domain family, member 1B                                                          | 2.1         | 0.00113            |
| NUP62    | nucleoporin 62kDa                                                                        | 2.09        | 0.00229            |
| NEK6     | NIMA-related kinase 6                                                                    | 2.04        | 0.00019            |

|          |                                                                                   |      |         |
|----------|-----------------------------------------------------------------------------------|------|---------|
| IGSF6    | immunoglobulin superfamily, member 6                                              | 2    | 0.00108 |
| DOCK4    | dedicator of cytokinesis 4                                                        | 2    | 0.00130 |
| PRKD2    | protein kinase D2                                                                 | 1.99 | 0.00026 |
| PPIF     | peptidylprolyl isomerase F                                                        | 1.99 | 0.00040 |
| ITGAX    | integrin, alpha X (complement component 3 receptor 4 subunit)                     | 1.99 | 0.00219 |
| CSF2RB   | colony stimulating factor 2 receptor, beta, low-affinity (granulocyte-macrophage) | 1.98 | 0.00026 |
| CSRNP1   | cysteine-serine-rich nuclear protein 1                                            | 1.96 | 0.00152 |
| PIM1     | Pim-1 proto-oncogene, serine/threonine kinase                                     | 1.95 | 0.00002 |
| FGL2     | fibrinogen-like 2                                                                 | 1.95 | 0.00183 |
| C2       | complement component 2                                                            | 1.95 | 0.00108 |
| GADD45G  | growth arrest and DNA-damage-inducible, gamma                                     | 1.92 | 0.00021 |
| TYMP     | thymidine phosphorylase                                                           | 1.91 | 0.00011 |
| HLA-DPB1 | major histocompatibility complex, class II, DP beta 1                             | 1.91 | 0.00003 |
| SLC31A2  | solute carrier family 31 (copper transporter), member 2                           | 1.9  | 0.00203 |
| DUSP5    | dual specificity phosphatase 5                                                    | 1.89 | 0.00164 |

**Table S2b. Genes downregulated in CBD-stimulated PBMCs compared with Controls -stimulated PBMCs.**

| Symbol     | Name                                                         | Fold-change | Parametric p-value |
|------------|--------------------------------------------------------------|-------------|--------------------|
| SNORD116-6 | small nucleolar RNA, C/D box 116-6                           | 0.5         | 0.00027            |
| VPS29      | vacuolar protein sorting 29 homolog ( <i>S. cerevisiae</i> ) | 0.58        | 0.00070            |
| EIF3E      | eukaryotic translation initiation factor 3, subunit E        | 0.6         | 0.00060            |
| MAP2K6     | mitogen-activated protein kinase kinase 6                    | 0.63        | 0.00071            |

**Table S3 a. Genes up-regulated in CBD compared with BeS.**

| Symbol | Name                           | Fold change | Parametric p-value |
|--------|--------------------------------|-------------|--------------------|
| CYHR1  | cysteine/histidine-rich 1      | 1.56        | 0.00014            |
| GPR162 | G protein-coupled receptor 162 | 1.54        | 0.00108            |
| IER3   | immediate early response 3     | 1.52        | 0.00089            |

**Table S3 b. Genes down-regulated in CBD compared with BeS.**

| Symbol      | Name                                | Fold-change | Parametric p-value |
|-------------|-------------------------------------|-------------|--------------------|
| SNORD94     | small nucleolar RNA, C/D box 94     | 0.52        | 0.00040            |
| SNORD116-24 | small nucleolar RNA, C/D box 116-24 | 0.55        | 0.00003            |
| SNORD116-15 | small nucleolar RNA, C/D box 116-15 | 0.59        | 0.00011            |
| SNORD116-1  | small nucleolar RNA, C/D box 116-1  | 0.63        | 0.00043            |
| ZNF737      | zinc finger protein 737             | 0.66        | 0.00133            |
| SNORD116-8  | small nucleolar RNA, C/D box 116-8  | 0.67        | 0.00100            |

**Table S4 a. Genes up-regulated in CBD compared with con.**

| Symbol  | Name                                                        | Fold change | Parametric p-value |
|---------|-------------------------------------------------------------|-------------|--------------------|
| FUCA1   | fucosidase, alpha-L- 1, tissue                              | 2.17        | 0.02971            |
| CD9     | CD9 molecule                                                | 2           | 0.02137            |
| CYP27A1 | cytochrome P450, family 27, subfamily A, polypeptide 1      | 1.79        | 0.02583            |
| ACP5    | acid phosphatase 5, tartrate resistant                      | 1.71        | 0.00778            |
| ST14    | suppression of tumorigenicity 14 (colon carcinoma)          | 1.7         | 0.00349            |
| ANPEP   | alanyl (membrane) aminopeptidase                            | 1.67        | 0.00260            |
| DSC2    | desmocollin 2                                               | 1.67        | 0.00568            |
| LY86    | lymphocyte antigen 86                                       | 1.66        | 0.01340            |
| OLFML2B | olfactomedin-like 2B                                        | 1.64        | 0.02168            |
| PLIN2   | perilipin 2                                                 | 1.64        | 0.03484            |
| SLCO2B1 | solute carrier organic anion transporter family, member 2B1 | 1.63        | 0.02741            |
| MS4A1   | membrane-spanning 4-domains, subfamily A, member 1          | 1.61        | 0.02032            |
| FCRLA   | Fc receptor-like A                                          | 1.58        | 0.00599            |
| TPCN1   | two pore segment channel 1                                  | 1.57        | 0.01567            |
| DHRS9   | dehydrogenase/reductase (SDR family) member 9               | 1.56        | 0.04433            |
| LRP1    | low density lipoprotein receptor-related protein 1          | 1.54        | 0.03392            |
| PDGFC   | platelet derived growth factor C                            | 1.54        | 0.01085            |

|            |                                                                      |      |         |
|------------|----------------------------------------------------------------------|------|---------|
| ALOX5      | arachidonate 5-lipoxygenase                                          | 1.52 | 0.00423 |
| FCGRT      | Fc fragment of IgG, receptor, transporter, alpha                     | 1.52 | 0.00504 |
| IL1R1      | interleukin 1 receptor, type I                                       | 1.52 | 0.00886 |
| SLC37A2    | solute carrier family 37 (glucose-6-phosphate transporter), member 2 | 1.51 | 0.01003 |
| TLR5       | toll-like receptor 5                                                 | 1.51 | 0.00974 |
| ABHD6      | abhydrolase domain containing 6                                      | 1.5  | 0.00093 |
| CTSD       | cathepsin D                                                          | 1.5  | 0.00689 |
| DAGLB      | diacylglycerol lipase, beta                                          | 1.5  | 0.00400 |
| MPP1       | membrane protein, palmitoylated 1, 55kDa                             | 1.5  | 0.03872 |
| THUMP3-AS1 | THUMP3 antisense RNA 1                                               | 1.5  | 0.01140 |

**Table S4 b. Genes down-regulated in CBD compared with con.**

| Symbol      | Name                                                 | Fold change | Parametric p-value |
|-------------|------------------------------------------------------|-------------|--------------------|
| SNORD115-20 | small nucleolar RNA, C/D box 115-20                  | 0.40        | 0.03214            |
| MIR382      | microRNA 382                                         | 0.47        | 0.02974            |
| KRTAP4-6    | keratin associated protein 4-6                       | 0.53        | 0.01259            |
| SNORD115-25 | small nucleolar RNA, C/D box 115-25                  | 0.55        | 0.04714            |
| SNORD116-6  | small nucleolar RNA, C/D box 116-6                   | 0.55        | 0.02461            |
| TMEM51-AS1  | TMEM51 antisense RNA 1                               | 0.55        | 0.03077            |
| LOC388692   | uncharacterized LOC388692                            | 0.57        | 0.03039            |
| KRTAP4-11   | keratin associated protein 4-11                      | 0.59        | 0.01491            |
| LOC441233   | uncharacterized LOC441233                            | 0.59        | 0.01782            |
| OR8B8       | olfactory receptor, family 8, subfamily B, member 8  | 0.60        | 0.00141            |
| KRTAP4-9    | keratin associated protein 4-9                       | 0.61        | 0.01542            |
| KRTAP5-6    | keratin associated protein 5-6                       | 0.61        | 0.00961            |
| FFAR2       | free fatty acid receptor 2                           | 0.63        | 0.03334            |
| KRTAP5-10   | keratin associated protein 5-10                      | 0.63        | 0.03733            |
| KRTAP5-7    | keratin associated protein 5-7                       | 0.63        | 0.03269            |
| KRTAP5-9    | keratin associated protein 5-9                       | 0.63        | 0.04512            |
| KRTAP9-2    | keratin associated protein 9-2                       | 0.63        | 0.00670            |
| KRTAP9-8    | keratin associated protein 9-8                       | 0.63        | 0.01127            |
| FLJ38773    | uncharacterized protein FLJ38773                     | 0.64        | 0.02792            |
| KRTAP4-4    | keratin associated protein 4-4                       | 0.64        | 0.03689            |
| OR10G2      | olfactory receptor, family 10, subfamily G, member 2 | 0.64        | 0.00211            |
| KRTAP4-7    | keratin associated protein 4-7                       | 0.65        | 0.03223            |
| KRTAP9-4    | keratin associated protein 9-4                       | 0.65        | 0.01480            |
| MRGPRX4     | MAS-related GPR, member X4                           | 0.65        | 0.00806            |
| SNORD115-31 | small nucleolar RNA, C/D box 115-31                  | 0.65        | 0.03071            |
| CFB         | complement factor B                                  | 0.66        | 0.03070            |
| KRTAP10-4   | keratin associated protein 10-4                      | 0.66        | 0.01179            |

**Table S5a. upregulated genes shared between CBD and sarcoidosis peripheral blood gene expression from Koth et al (GDS4587)(17)**

| Symbol   | Name                                                                                     | Parametric p-value |
|----------|------------------------------------------------------------------------------------------|--------------------|
| NFKBIE   | nuclear factor of kappa light polypeptide gene enhancer in B-cells inhibitor, epsilon    | 0.00004            |
| ICAM1    | intercellular adhesion molecule 1                                                        | 0.00005            |
| LILRB4   | leukocyte immunoglobulin-like receptor, subfamily B (with TM and ITIM domains), member 4 | 0.00006            |
| NEK6     | NIMA (never in mitosis gene a)-related kinase 6                                          | 0.00007            |
| STX11    | syntaxin 11                                                                              | 0.00007            |
| SOCS1    | suppressor of cytokine signaling 1                                                       | 0.00010            |
| P2RX7    | purinergic receptor P2X, ligand-gated ion channel, 7                                     | 0.00010            |
| BAK1     | BCL2-antagonist/killer 1                                                                 | 0.00011            |
| FLVCR2   | feline leukemia virus subgroup C cellular receptor family, member 2                      | 0.00011            |
| CD274    | CD274 molecule                                                                           | 0.00012            |
| IRF1     | interferon regulatory factor 1                                                           | 0.00013            |
| ATF3     | activating transcription factor 3                                                        | 0.00014            |
| WDFY1    | WD repeat and FYVE domain containing 1                                                   | 0.00015            |
| LRP10    | low density lipoprotein receptor-related protein 10                                      | 0.00015            |
| CD74     | CD74 molecule, major histocompatibility complex, class II invariant chain                | 0.00015            |
| KIAA0040 | KIAA0040                                                                                 | 0.00016            |
| RHBDF2   | rhomboïd 5 homolog 2 (Drosophila)                                                        | 0.00016            |
| CD97     | CD97 molecule                                                                            | 0.00017            |
| RNF19B   | ring finger protein 19B                                                                  | 0.00017            |
| CTSC     | cathepsin C                                                                              | 0.00020            |
| TAP1     | transporter 1, ATP-binding cassette, sub-family B (MDR/TAP)                              | 0.00025            |
| PLEK     | pleckstrin                                                                               | 0.00026            |
| IDO1     | indoleamine 2,3-dioxygenase 1                                                            | 0.00026            |
| GBP5     | guanylate binding protein 5                                                              | 0.00027            |
| SOCS3    | suppressor of cytokine signaling 3                                                       | 0.00031            |
| JUNB     | jun B proto-oncogene                                                                     | 0.00031            |
| MMP14    | matrix metalloproteinase 14 (membrane-inserted)                                          | 0.00032            |
| ARSB     | arylsulfatase B                                                                          | 0.00032            |
| PDCD1LG2 | programmed cell death 1 ligand 2                                                         | 0.00034            |
| CASP4    | caspase 4, apoptosis-related cysteine peptidase                                          | 0.00034            |
| SQRDL    | sulfide quinone reductase-like (yeast)                                                   | 0.00035            |
| RAB20    | RAB20, member RAS oncogene family                                                        | 0.00035            |
| RIPK2    | receptor-interacting serine-threonine kinase 2                                           | 0.00036            |
| CXCL9    | chemokine (C-X-C motif) ligand 9                                                         | 0.00036            |
| TYMP     | thymidine phosphorylase                                                                  | 0.00037            |



|          |                                                                      |         |
|----------|----------------------------------------------------------------------|---------|
| TAP2     | transporter 2, ATP-binding cassette, sub-family B (MDR/TAP)          | 0.00038 |
| NRP2     | neuropilin 2                                                         | 0.00041 |
| MSR1     | macrophage scavenger receptor 1                                      | 0.00044 |
| LMNB1    | lamin B1                                                             | 0.00044 |
| DAPP1    | dual adaptor of phosphotyrosine and 3-phosphoinositides              | 0.00045 |
| NLRC5    | NLR family, CARD domain containing 5                                 | 0.00046 |
| SRC      | v-src sarcoma (Schmidt-Ruppin A-2) viral oncogene homolog (avian)    | 0.00049 |
| ADAM19   | ADAM metalloproteinase domain 19                                     | 0.00057 |
| CCRL2    | chemokine (C-C motif) receptor-like 2                                | 0.00058 |
| SNX10    | sorting nexin 10                                                     | 0.00061 |
| SLC25A28 | solute carrier family 25, member 28                                  | 0.00062 |
| CLEC4E   | C-type lectin domain family 4, member E                              | 0.00064 |
| ASPHD2   | aspartate beta-hydroxylase domain containing 2                       | 0.00064 |
| ANKFY1   | ankyrin repeat and FYVE domain containing 1                          | 0.00065 |
| PIK3AP1  | phosphoinositide-3-kinase adaptor protein 1                          | 0.00068 |
| PRKD2    | protein kinase D2                                                    | 0.00068 |
| SLC31A2  | solute carrier family 31 (copper transporters), member 2             | 0.00068 |
| GBP2     | guanylate binding protein 2, interferon-inducible                    | 0.00072 |
| IGSF6    | immunoglobulin superfamily, member 6                                 | 0.00073 |
| TRIM25   | tripartite motif-containing 25                                       | 0.00074 |
| FAM26F   | family with sequence similarity 26, member F                         | 0.00074 |
| PSMB10   | proteasome (prosome, macropain) subunit, beta type, 10               | 0.00077 |
| ABCD1    | ATP-binding cassette, sub-family D (ALD), member 1                   | 0.00078 |
| AKIRIN2  | akirin 2                                                             | 0.00078 |
| SCPEP1   | serine carboxypeptidase 1                                            | 0.00080 |
| CCL18    | chemokine (C-C motif) ligand 18 (pulmonary and activation-regulated) | 0.00081 |
| EGR2     | early growth response 2                                              | 0.00081 |
| PSME2    | proteasome (prosome, macropain) activator subunit 2 (PA28 beta)      | 0.00082 |
| SECTM1   | secreted and transmembrane 1                                         | 0.00084 |
| LIMK1    | LIM domain kinase 1                                                  | 0.00085 |
| APOL1    | apolipoprotein L, 1                                                  | 0.00089 |
| ADPGK    | ADP-dependent glucokinase                                            | 0.00089 |
| TMEM140  | transmembrane protein 140                                            | 0.00089 |
| TRIM21   | tripartite motif-containing 21                                       | 0.00091 |
| MVP      | major vault protein                                                  | 0.00093 |
| MYOF     | myoferlin                                                            | 0.00096 |
| ZNFX1    | zinc finger, NFX1-type containing 1                                  | 0.00098 |
| DRAM1    | DNA-damage regulated autophagy modulator 1                           | 0.00100 |
| KLF10    | Kruppel-like factor 10                                               | 0.00101 |
| WARS     | tryptophanyl-tRNA synthetase                                         | 0.00103 |
| CTSZ     | cathepsin Z                                                          | 0.00107 |
| B4GALT5  | UDP-Gal:betaGlcNAc beta 1,4- galactosyltransferase, polypeptide 5    | 0.00107 |

|          |                                                                                          |         |
|----------|------------------------------------------------------------------------------------------|---------|
| TMEM150B | transmembrane protein 150B                                                               | 0.00108 |
| CXCL11   | chemokine (C-X-C motif) ligand 11                                                        | 0.00108 |
| KCNJ2    | potassium inwardly-rectifying channel, subfamily J, member 2                             | 0.00108 |
| FGD2     | FYVE, RhoGEF and PH domain containing 2                                                  | 0.00114 |
| TNFSF13B | tumor necrosis factor (ligand) superfamily, member 13b                                   | 0.00115 |
| OGFR     | opioid growth factor receptor                                                            | 0.00115 |
| BLVRA    | biliverdin reductase A                                                                   | 0.00119 |
| CLCN7    | chloride channel 7                                                                       | 0.00124 |
| PLAUR    | plasminogen activator, urokinase receptor                                                | 0.00125 |
| GBP4     | guanylate binding protein 4                                                              | 0.00127 |
| SEMA7A   | semaphorin 7A, GPI membrane anchor (John Milton Hagen blood group)                       | 0.00129 |
| KPNA2    | karyopherin alpha 2 (RAG cohort 1, importin alpha 1)                                     | 0.00129 |
| CD40     | CD40 molecule, TNF receptor superfamily member 5                                         | 0.00130 |
| LILRB3   | leukocyte immunoglobulin-like receptor, subfamily B (with TM and ITIM domains), member 3 | 0.00131 |
| HBEGF    | heparin-binding EGF-like growth factor                                                   | 0.00133 |
| NBN      | nibrin                                                                                   | 0.00136 |
| MTF1     | metal-regulatory transcription factor 1                                                  | 0.00137 |
| TRAFD1   | TRAF-type zinc finger domain containing 1                                                | 0.00138 |
| NAPA     | N-ethylmaleimide-sensitive factor attachment protein, alpha                              | 0.00140 |
| TRIB1    | tribbles homolog 1 (Drosophila)                                                          | 0.00142 |
| PML      | promyelocytic leukemia                                                                   | 0.00144 |
| PARP3    | poly (ADP-ribose) polymerase family, member 3                                            | 0.00144 |
| ACP2     | acid phosphatase 2, lysosomal                                                            | 0.00146 |
| DOT1L    | DOT1-like, histone H3 methyltransferase (S. cerevisiae)                                  | 0.00147 |
| SIRT7    | sirtuin 7                                                                                | 0.00149 |
| RBCK1    | RanBP-type and C3HC4-type zinc finger containing 1                                       | 0.00153 |
| SLC1A3   | solute carrier family 1 (glial high affinity glutamate transporter), member 3            | 0.00154 |
| ACOT9    | acyl-CoA thioesterase 9                                                                  | 0.00157 |
| LY6E     | lymphocyte antigen 6 complex, locus E                                                    | 0.00160 |
| SLAMF8   | SLAM family member 8                                                                     | 0.00160 |
| SERPING1 | serpin peptidase inhibitor, clade G (C1 inhibitor), member 1                             | 0.00163 |
| RSAD2    | radical S-adenosyl methionine domain containing 2                                        | 0.00164 |
| INHBA    | inhibin, beta A                                                                          | 0.00166 |
| NRP1     | neuropilin 1                                                                             | 0.00173 |
| RNF213   | ring finger protein 213                                                                  | 0.00174 |
| CEACAM1  | carcinoembryonic antigen-related cell adhesion molecule 1 (biliary glycoprotein)         | 0.00177 |
| OAS1     | 2',5'-oligoadenylate synthetase 1, 40/46kDa                                              | 0.00179 |
| APOL2    | apolipoprotein L, 2                                                                      | 0.00181 |
| STAT2    | signal transducer and activator of transcription 2, 113kDa                               | 0.00193 |
| MT2A     | metallothionein 2A                                                                       | 0.00196 |

|         |                                                                                           |         |
|---------|-------------------------------------------------------------------------------------------|---------|
| PARP9   | poly (ADP-ribose) polymerase family, member 9                                             | 0.00196 |
| IFI35   | interferon-induced protein 35                                                             | 0.00202 |
| ECE1    | endothelin converting enzyme 1                                                            | 0.00203 |
| ITGAM   | integrin, alpha M (complement component 3 receptor 3 subunit)                             | 0.00203 |
| DOCK4   | dedicator of cytokinesis 4                                                                | 0.00204 |
| GBP1    | guanylate binding protein 1, interferon-inducible, 67kDa                                  | 0.00206 |
| GADD45G | growth arrest and DNA-damage-inducible, gamma                                             | 0.00211 |
| IFIT3   | interferon-induced protein with tetratricopeptide repeats 3                               | 0.00219 |
| LIMK2   | LIM domain kinase 2                                                                       | 0.00223 |
| IFIT2   | interferon-induced protein with tetratricopeptide repeats 2                               | 0.00225 |
| DRAP1   | DR1-associated protein 1 (negative cofactor 2 alpha)                                      | 0.00226 |
| TRIM38  | tripartite motif-containing 38                                                            | 0.00226 |
| CXCL16  | chemokine (C-X-C motif) ligand 16                                                         | 0.00227 |
| FAM129B | family with sequence similarity 129, member B                                             | 0.00229 |
| FNDC3B  | fibronectin type III domain containing 3B                                                 | 0.00232 |
| UNC93B1 | unc-93 homolog B1 (C. elegans)                                                            | 0.00247 |
| TANK    | TRAF family member-associated NFKB activator                                              | 0.00249 |
| CASP1   | caspase 1, apoptosis-related cysteine peptidase (interleukin 1, beta, convertase)         | 0.00249 |
| TRANK1  | tetratricopeptide repeat and ankyrin repeat containing 1                                  | 0.00253 |
| OASL    | 2'-5'-oligoadenylate synthetase-like                                                      | 0.00254 |
| APOL6   | apolipoprotein L, 6                                                                       | 0.00255 |
| TNFSF10 | tumor necrosis factor (ligand) superfamily, member 10                                     | 0.00258 |
| LILRB1  | leukocyte immunoglobulin-like receptor, subfamily B (with TM and ITIM domains), member 1  | 0.00261 |
| ANKRD22 | ankyrin repeat domain 22                                                                  | 0.00270 |
| UBE2L6  | ubiquitin-conjugating enzyme E2L 6                                                        | 0.00272 |
| BST2    | bone marrow stromal cell antigen 2                                                        | 0.00274 |
| ARNTL2  | aryl hydrocarbon receptor nuclear translocator-like 2                                     | 0.00289 |
| STAT1   | signal transducer and activator of transcription 1, 91kDa                                 | 0.00292 |
| EPSTI1  | epithelial stromal interaction 1 (breast)                                                 | 0.00295 |
| IRF9    | interferon regulatory factor 9                                                            | 0.00302 |
| SLC7A7  | solute carrier family 7 (cationic amino acid transporter, y+ system), member 7            | 0.00312 |
| MOV10   | Mov10, Moloney leukemia virus 10, homolog (mouse)                                         | 0.00312 |
| LHFPL2  | lipoma HMGIC fusion partner-like 2                                                        | 0.00319 |
| ODF3B   | outer dense fiber of sperm tails 3B                                                       | 0.00326 |
| TCIRG1  | T-cell, immune regulator 1, ATPase, H+ transporting, lysosomal V0 subunit A3              | 0.00326 |
| LAP3    | leucine aminopeptidase 3                                                                  | 0.00329 |
| ITGAX   | integrin, alpha X (complement component 3 receptor 4 subunit)                             | 0.00331 |
| FMNL2   | formin-like 2                                                                             | 0.00333 |
| PSMB8   | proteasome (prosome, macropain) subunit, beta type, 8 (large multifunctional peptidase 7) | 0.00335 |

|         |                                                                                           |         |
|---------|-------------------------------------------------------------------------------------------|---------|
| XAF1    | XIAP associated factor 1                                                                  | 0.00350 |
| C2      | complement component 2                                                                    | 0.00360 |
| FCGR1A  | Fc fragment of IgG, high affinity Ia, receptor (CD64)                                     | 0.00388 |
| PSMB9   | proteasome (prosome, macropain) subunit, beta type, 9 (large multifunctional peptidase 2) | 0.00396 |
| FBP1    | fructose-1,6-bisphosphatase 1                                                             | 0.00396 |
| GM2A    | GM2 ganglioside activator                                                                 | 0.00396 |
| JAK2    | Janus kinase 2                                                                            | 0.00403 |
| ZBP1    | Z-DNA binding protein 1                                                                   | 0.00403 |
| IFI44   | interferon-induced protein 44                                                             | 0.00411 |
| FCGR1B  | Fc fragment of IgG, high affinity Ib, receptor (CD64)                                     | 0.00415 |
| ATP2A2  | ATPase, Ca <sup>++</sup> transporting, cardiac muscle, slow twitch 2                      | 0.00415 |
| CXCL10  | chemokine (C-X-C motif) ligand 10                                                         | 0.00418 |
| VAMP5   | vesicle-associated membrane protein 5 (myobrevin)                                         | 0.00419 |
| NEU1    | sialidase 1 (lysosomal sialidase)                                                         | 0.00420 |
| FBXO6   | F-box protein 6                                                                           | 0.00430 |
| GTPBP1  | GTP binding protein 1                                                                     | 0.00432 |
| CSF1    | colony stimulating factor 1 (macrophage)                                                  | 0.00433 |
| GSDMD   | gasdermin D                                                                               | 0.00443 |
| GCH1    | GTP cyclohydrolase 1                                                                      | 0.00445 |
| IFI44L  | interferon-induced protein 44-like                                                        | 0.00453 |
| NFKB2   | nuclear factor of kappa light polypeptide gene enhancer in B-cells 2 (p49/p100)           | 0.00460 |
| SP110   | SP110 nuclear body protein                                                                | 0.00464 |
| PARP10  | poly (ADP-ribose) polymerase family, member 10                                            | 0.00467 |
| CD276   | CD276 molecule                                                                            | 0.00475 |
| DTX3L   | deltex 3-like (Drosophila)                                                                | 0.00478 |
| TDRD7   | tudor domain containing 7                                                                 | 0.00487 |
| TIFA    | TRAF-interacting protein with forkhead-associated domain                                  | 0.00488 |
| BAZ1A   | bromodomain adjacent to zinc finger domain, 1A                                            | 0.00509 |
| CCL24   | chemokine (C-C motif) ligand 24                                                           | 0.00513 |
| MT1G    | metallothionein 1G                                                                        | 0.00518 |
| PARP14  | poly (ADP-ribose) polymerase family, member 14                                            | 0.00522 |
| TFEC    | transcription factor EC                                                                   | 0.00524 |
| MREG    | melanoregulin                                                                             | 0.00524 |
| SAMD9L  | sterile alpha motif domain containing 9-like                                              | 0.00548 |
| ISG20   | interferon stimulated exonuclease gene 20kDa                                              | 0.00568 |
| DDX60L  | DEAD (Asp-Glu-Ala-Asp) box polypeptide 60-like                                            | 0.00571 |
| FCGR2A  | Fc fragment of IgG, low affinity IIa, receptor (CD32)                                     | 0.00574 |
| SIRPA   | signal-regulatory protein alpha                                                           | 0.00578 |
| NFKBIZ  | nuclear factor of kappa light polypeptide gene enhancer in B-cells inhibitor, zeta        | 0.00588 |
| OSM     | oncostatin M                                                                              | 0.00614 |
| SLC27A3 | solute carrier family 27 (fatty acid transporter), member 3                               | 0.00619 |

|              |                                                                                               |         |
|--------------|-----------------------------------------------------------------------------------------------|---------|
| OAS3         | 2'-5'-oligoadenylate synthetase 3, 100kDa                                                     | 0.00620 |
| SERPINE1     | serpin peptidase inhibitor, clade E (nexin, plasminogen activator inhibitor type 1), member 1 | 0.00625 |
| IFIH1        | interferon induced with helicase C domain 1                                                   | 0.00627 |
| APOBEC3G     | apolipoprotein B mRNA editing enzyme, catalytic polypeptide-like 3G                           | 0.00635 |
| ETV7         | ets variant 7                                                                                 | 0.00638 |
| FAM46A       | family with sequence similarity 46, member A                                                  | 0.00672 |
| LOC100288594 | hypothetical LOC100288594                                                                     | 0.00678 |
| RALB         | v-ral simian leukemia viral oncogene homolog B (ras related; GTP binding protein)             | 0.00712 |
| NUB1         | negative regulator of ubiquitin-like proteins 1                                               | 0.00717 |
| DDX58        | DEAD (Asp-Glu-Ala-Asp) box polypeptide 58                                                     | 0.00723 |
| LILRB2       | leukocyte immunoglobulin-like receptor, subfamily B (with TM and ITIM domains), member 2      | 0.00758 |
| IL15RA       | interleukin 15 receptor, alpha                                                                | 0.00774 |
| FAR2         | fatty acyl CoA reductase 2                                                                    | 0.00781 |
| TLR8         | toll-like receptor 8                                                                          | 0.00785 |
| ACP5         | acid phosphatase 5, tartrate resistant                                                        | 0.00794 |
| ALPK1        | alpha-kinase 1                                                                                | 0.00806 |
| BCL2L1       | BCL2-like 1                                                                                   | 0.00830 |
| FAS          | Fas (TNF receptor superfamily, member 6)                                                      | 0.00841 |
| LPCAT2       | lysophosphatidylcholine acyltransferase 2                                                     | 0.00869 |
| SNTB1        | syntrophin, beta 1 (dystrophin-associated protein A1, 59kDa, basic component 1)               | 0.00872 |
| HLA-DPA1     | major histocompatibility complex, class II, DP alpha 1                                        | 0.00898 |
| AIM2         | absent in melanoma 2                                                                          | 0.00903 |
| FAM122C      | family with sequence similarity 122C                                                          | 0.00907 |
| STOM         | stomatin                                                                                      | 0.00935 |
| EMR2         | egf-like module containing, mucin-like, hormone receptor-like 2                               | 0.00940 |
| TRIM22       | tripartite motif-containing 22                                                                | 0.00950 |
| PSTPIP2      | proline-serine-threonine phosphatase interacting protein 2                                    | 0.00961 |
| JAG1         | jagged 1                                                                                      | 0.00976 |
| TYROBP       | TYRO protein tyrosine kinase binding protein                                                  | 0.00999 |
| PSEN2        | presenilin 2 (Alzheimer disease 4)                                                            | 0.01022 |
| RTP4         | receptor (chemosensory) transporter protein 4                                                 | 0.01034 |
| TLR7         | toll-like receptor 7                                                                          | 0.01043 |
| IFI16        | interferon, gamma-inducible protein 16                                                        | 0.01045 |
| CMPK2        | cytidine monophosphate (UMP-CMP) kinase 2, mitochondrial                                      | 0.01048 |
| TLR1         | toll-like receptor 1                                                                          | 0.01070 |
| SOD2         | superoxide dismutase 2, mitochondrial                                                         | 0.01080 |
| DYNLT1       | dynein, light chain, Tctex-type 1                                                             | 0.01081 |
| TGM2         | transglutaminase 2 (C polypeptide, protein-glutamine-gamma-glutamyltransferase)               | 0.01083 |
| PILRA        | paired immunoglobulin-like type 2 receptor alpha                                              | 0.01083 |

|         |                                                                    |         |
|---------|--------------------------------------------------------------------|---------|
| GSN     | gelsolin                                                           | 0.01132 |
| CD86    | CD86 molecule                                                      | 0.01135 |
| PLSCR1  | phospholipid scramblase 1                                          | 0.01157 |
| XRN1    | 5'-3' exoribonuclease 1                                            | 0.01161 |
| BCL2L14 | BCL2-like 14 (apoptosis facilitator)                               | 0.01189 |
| GK      | glycerol kinase                                                    | 0.01224 |
| C1QB    | complement component 1, q subcomponent, B chain                    | 0.01248 |
| GNB4    | guanine nucleotide binding protein (G protein), beta polypeptide 4 | 0.01326 |
| SLC31A1 | solute carrier family 31 (copper transporters), member 1           | 0.01346 |
| SAMD9   | sterile alpha motif domain containing 9                            | 0.01385 |
| SCARB2  | scavenger receptor class B, member 2                               | 0.01390 |
| LGALS9  | lectin, galactoside-binding, soluble, 9                            | 0.01449 |
| CD68    | CD68 molecule                                                      | 0.01461 |
| TFE3    | transcription factor binding to IGHM enhancer 3                    | 0.01468 |
| TNFAIP2 | tumor necrosis factor, alpha-induced protein 2                     | 0.01532 |
| TLN2    | talin 2                                                            | 0.01540 |
| ZC3H12C | zinc finger CCCH-type containing 12C                               | 0.01547 |
| MLKL    | mixed lineage kinase domain-like                                   | 0.01593 |
| CTSB    | cathepsin B                                                        | 0.01655 |
| TNFAIP6 | tumor necrosis factor, alpha-induced protein 6                     | 0.01728 |
| CARD16  | caspase recruitment domain family, member 16                       | 0.01764 |
| IFIT5   | interferon-induced protein with tetratricopeptide repeats 5        | 0.01807 |
| APOL4   | apolipoprotein L, 4                                                | 0.01848 |
| SAT1    | spermidine/spermine N1-acetyltransferase 1                         | 0.01881 |
| SLC43A2 | solute carrier family 43, member 2                                 | 0.01948 |
| TBC1D2  | TBC1 domain family, member 2                                       | 0.01966 |
| ARNT2   | aryl-hydrocarbon receptor nuclear translocator 2                   | 0.01995 |
| CTNNA1  | catenin (cadherin-associated protein), alpha 1, 102kDa             | 0.02094 |
| CD209   | CD209 molecule                                                     | 0.02115 |
| LACTB   | lactamase, beta                                                    | 0.02199 |
| DNASE2  | deoxyribonuclease II, lysosomal                                    | 0.02381 |
| STXBP2  | syntaxin binding protein 2                                         | 0.02406 |
| IRF7    | interferon regulatory factor 7                                     | 0.02467 |
| GRN     | granulin                                                           | 0.02606 |
| SUCNR1  | succinate receptor 1                                               | 0.02610 |
| PGD     | phosphogluconate dehydrogenase                                     | 0.02689 |

**Fig S5b. Down-regulated genes shared by CBD and sarcoidosis peripheral blood mononuclear cells (GDS4587. Koth et al 17)**

| Symbol | Name                        | Parametric p-value |
|--------|-----------------------------|--------------------|
| TC2N   | tandem C2 domains, nuclear  | 0.00123            |
| RASA4  | RAS p21 protein activator 4 | 0.00187            |

|          |                                                        |         |
|----------|--------------------------------------------------------|---------|
| KLHL3    | kelch-like 3 (Drosophila)                              | 0.00418 |
| GPR183   | G protein-coupled receptor 183                         | 0.00543 |
| SESN3    | sestrin 3                                              | 0.00660 |
| AKTIP    | AKT interacting protein                                | 0.00720 |
| KRT73    | keratin 73                                             | 0.00772 |
| GCNT4    | glucosaminyl (N-acetyl) transferase 4, core 2          | 0.00962 |
| NELL2    | NEL-like 2 (chicken)                                   | 0.00990 |
| TTC3     | tetratricopeptide repeat domain 3                      | 0.01002 |
| VSIG1    | V-set and immunoglobulin domain containing 1           | 0.01521 |
| STK38    | serine/threonine kinase 38                             | 0.01567 |
| PCYOX1   | prenylcysteine oxidase 1                               | 0.01949 |
| ANKRD36B | ankyrin repeat domain 36B                              | 0.02122 |
| PREPL    | prolyl endopeptidase-like                              | 0.02250 |
| KLRB1    | killer cell lectin-like receptor subfamily B, member 1 | 0.02355 |

**Table S5c. Genes that are up-regulated in sarcoidosis but down-regulated in CBD peripheral blood mononuclear cells(GDS4587. Koth et al 17).**

| <b>Symbol</b> | <b>Name</b>                     | <b>Parametric p-value</b> |
|---------------|---------------------------------|---------------------------|
| <b>RNASE3</b> | ribonuclease, RNase A family, 3 | 0.0001031                 |

**Table S5d. Genes that are down-regulated in sarcoidosis but up-regulated in CBD peripheral blood mononuclear cells(GDS4587. Koth et al 17).**

| <b>Symbol</b>   | <b>Name</b>                                                                  | <b>Parametric p-value</b> |
|-----------------|------------------------------------------------------------------------------|---------------------------|
| <b>ABL2</b>     | v-abl Abelson murine leukemia viral oncogene homolog 2                       | 0.0001985                 |
| <b>PFKP</b>     | phosphofructokinase, platelet                                                | 0.0002113                 |
| <b>BCL2</b>     | B-cell CLL/lymphoma 2                                                        | 0.0006361                 |
| <b>CCND2</b>    | cyclin D2                                                                    | 0.0010465                 |
| <b>FAM115C</b>  | family with sequence similarity 115, member C                                | 0.0012438                 |
| <b>NFE2L3</b>   | nuclear factor (erythroid-derived 2)-like 3                                  | 0.00135                   |
| <b>SLC1A4</b>   | solute carrier family 1 (glutamate/neutral amino acid transporter), member 4 | 0.0013568                 |
| <b>PGAP1</b>    | post-GPI attachment to proteins 1                                            | 0.0017591                 |
| <b>ACTA2</b>    | actin, alpha 2, smooth muscle, aorta                                         | 0.0023326                 |
| <b>BCL11A</b>   | B-cell CLL/lymphoma 11A (zinc finger protein)                                | 0.0026089                 |
| <b>SERPINB9</b> | serpin peptidase inhibitor, clade B (ovalbumin), member 9                    | 0.0029085                 |
| <b>SPP1</b>     | secreted phosphoprotein 1                                                    | 0.0053925                 |
| <b>PPM1K</b>    | protein phosphatase, Mg <sup>2+</sup> /Mn <sup>2+</sup> dependent, 1K        | 0.0066405                 |



**Table S5e. Up-regulated genes found in both CBD peripheral blood transcripts and sarcoidosis lung tissue gene expression (GDS3580. Crouser et al 18).**

| Symbol | Name                                                                          | Parametric p-value |
|--------|-------------------------------------------------------------------------------|--------------------|
| CXCL9  | chemokine (C-X-C motif) ligand 9                                              | 0.00002            |
| FAM26F | family with sequence similarity 26, member F                                  | 0.00003            |
| TAP1   | transporter 1, ATP-binding cassette, sub-family B (MDR/TAP)                   | 0.00008            |
| CXCL11 | chemokine (C-X-C motif) ligand 11                                             | 0.00014            |
| GBP4   | guanylate binding protein 4                                                   | 0.00018            |
| CCL8   | chemokine (C-C motif) ligand 8                                                | 0.00020            |
| STAT1  | signal transducer and activator of transcription 1, 91kDa                     | 0.00032            |
| SLC1A3 | solute carrier family 1 (glial high affinity glutamate transporter), member 3 | 0.00054            |
| BCL11A | B-cell CLL/lymphoma 11A (zinc finger protein)                                 | 0.00070            |
| DOCK4  | dedicator of cytokinesis 4                                                    | 0.00073            |
| SLAMF7 | SLAM family member 7                                                          | 0.00131            |
| DDX60  | DEAD (Asp-Glu-Ala-Asp) box polypeptide 60                                     | 0.00139            |
| GNA13  | guanine nucleotide binding protein (G protein), alpha 13                      | 0.00141            |

**Table S5f. Down-regulated genes in both CBD peripheral blood transcripts and sarcoidosis lung tissue gene expression (GDS3580. Crouser et al. 18)**

| Symbol | Name                                               | Parametric p-value |
|--------|----------------------------------------------------|--------------------|
| ABCD3  | ATP-binding cassette, sub-family D (ALD), member 3 | 0.00195            |

**Table S5g. Genes that are up-regulated in sarcoidosis lung tissue but down-regulated in CBD peripheral blood cell transcripts (GDS3580. Crouser et al. 18)**

| Symbol | Name                                           | Parametric p-value |
|--------|------------------------------------------------|--------------------|
| TRERF1 | transcriptional regulating factor 1            | 0.00007            |
| SR140  | U2 snRNP-associated SURP domain containing     | 0.00008            |
| CCNG2  | cyclin G2                                      | 0.00012            |
| KBTBD6 | kelch repeat and BTB (POZ) domain containing 6 | 0.00016            |
| FYB    | FYN binding protein                            | 0.00021            |
| ZNF217 | zinc finger protein 217                        | 0.00028            |

|         |                                                                     |         |
|---------|---------------------------------------------------------------------|---------|
| SLC4A7  | solute carrier family 4, sodium bicarbonate cotransporter, member 7 | 0.00038 |
| STK4    | serine/threonine kinase 4                                           | 0.00039 |
| TBL1XR1 | transducin (beta)-like 1 X-linked receptor 1                        | 0.00084 |
| LPAR6   | lysophosphatidic acid receptor 6                                    | 0.00121 |
| NKTR    | natural killer cell triggering receptor                             | 0.00123 |
| ZNF92   | zinc finger protein 92                                              | 0.00127 |
| TRERF1  | transcriptional regulating factor 1                                 | 0.00129 |
| FBXL3   | F-box and leucine-rich repeat protein 3                             | 0.00158 |
| PSIP1   | PC4 and SFRS1 interacting protein 1                                 | 0.00188 |
| IFNGR1  | interferon gamma receptor 1                                         | 0.00194 |
| SH2D1A  | SH2 domain containing 1A                                            | 0.00197 |
| RBM12B  | RNA binding motif protein 12B                                       | 0.00206 |

**Table S5h. Genes that are down-regulated in sarcoidosis lung tissue but up-regulated in CBD peripheral blood transcripts (GDS3580. Crouser et al.18)**

| Symbol | Name                         | Parametric p-value |
|--------|------------------------------|--------------------|
| RHBDD2 | rhomboid domain containing 2 | 0.00007            |
